# Supplementary material for: Genome-Guided Identification of Organohalide-Respiring Deltaproteobacteria from the Marine Environment
Source: PubMed Central journal article supplement (PMC6299228; doi:10.1128/mbio.02471-18), 2018-12-18
Supplement: mbo006184233sf2.pdf [file mbo006184233sf2.pdf]

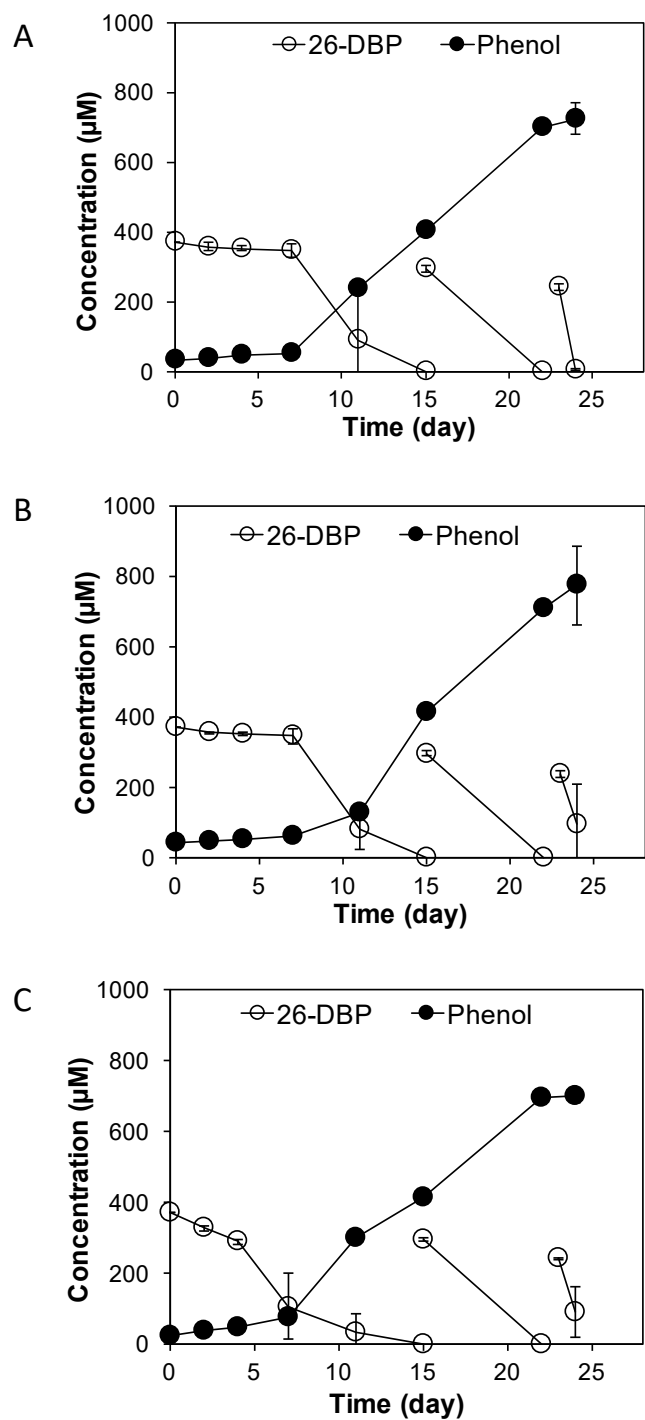

**Figure S2.** Debromination of 2,6-DBP and accumulation of phenol in *Halodesulfovibrio marinesediminis* (A), *Desulfuromusa kysingii* (B) and *Desulfovibrio bizertensis* (C) culture. The cultures were collected for an end point protein assay.
