# Supplementary material for: Genome-Guided Identification of Organohalide-Respiring Deltaproteobacteria from the Marine Environment
Source: PubMed Central journal article supplement (PMC6299228; doi:10.1128/mbio.02471-18), 2018-12-18
Supplement: mbo006184233sf3.pdf [file mbo006184233sf3.pdf]

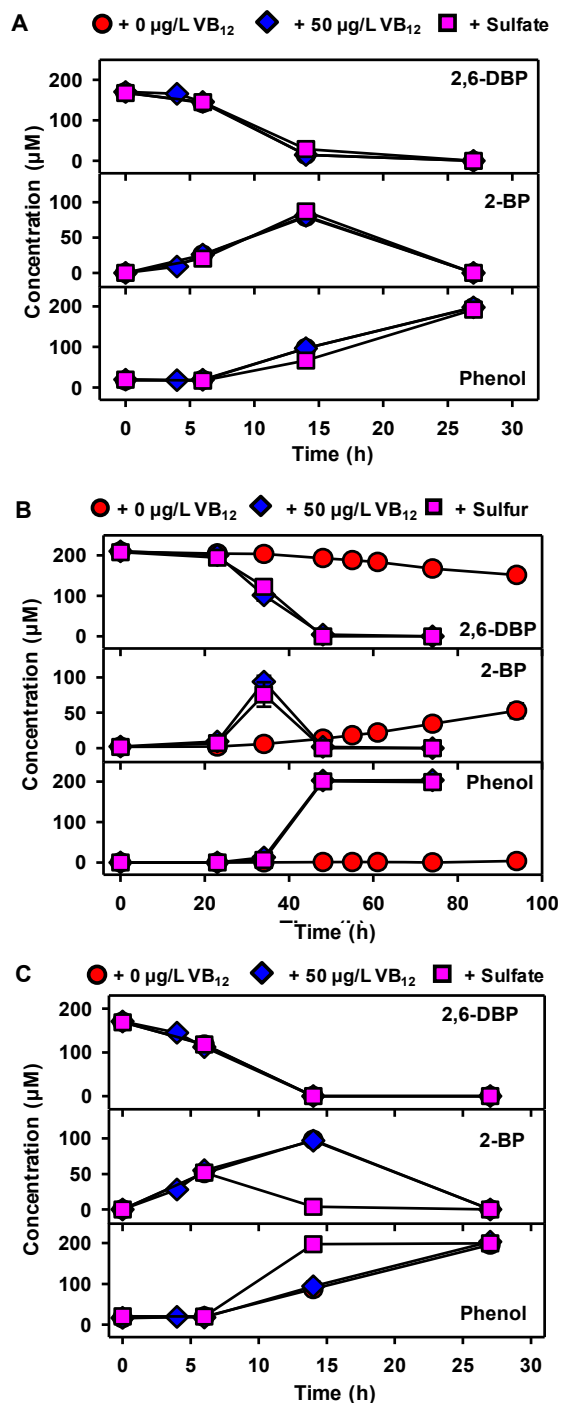

**Figure S3.** Dehalogenation of 2,6-DBP by *Halodesulfovibrio marinesediminis* (A), *Desulfuromusa kysingii* (B) and *Desulfovibrio bizertensis* (C) in the absence or presence of cobalamin (vitamin B<sub>12</sub>) and sulfate/sulfur as electron acceptor. For each figure, the upper panel indicates the concentration of 2,6-DBP in each treatment; the middle panel indicates the concentration of 2-BP and lower panel indicates the concentration of phenol. Data points indicate the means and standard deviations of triplicate cultures.
