# Supplementary material for: Genome-Guided Identification of Organohalide-Respiring Deltaproteobacteria from the Marine Environment
Source: PubMed Central journal article supplement (PMC6299228; doi:10.1128/mbio.02471-18), 2018-12-18
Supplement: mbo006184233st1.pdf [file mbo006184233st1.pdf]

**Table S1.** The genomic information of *Deltaproteobacteria* examined in this study and details of their reductive dehalogenase genes.

| Name                                           | GOLD Analysis Project Id | NCBI Taxon ID | Source                                       | Genome Size (Mb) | GC Content (%) | $\sigma^{54}$ - Dependent Activator | RDase A gene | Gene ID    | Length (bp) |
|------------------------------------------------|--------------------------|---------------|----------------------------------------------|------------------|----------------|-------------------------------------|--------------|------------|-------------|
| <i>Desulfovibrio bizertensis</i> DSM18034      | Ga0006634                | 1121442       | Marine sediment, Tunisia                     | 3.23             | 52.09          | 29                                  | RDase A2-1   | 2568539639 | 1443        |
|                                                |                          |               |                                              |                  |                |                                     | RDase A2-2   | 2568539642 | 1440        |
|                                                |                          |               |                                              |                  |                |                                     | RDase A3     | 2568540098 | 1440        |
|                                                |                          |               |                                              |                  |                |                                     | RDase A18    | 2568541747 | 1665        |
| <i>Desulfovibrio indicus</i> J2                | Ga0133372                | 1716143       | Serpentinized peridotite, Indian Ocean       | 3.97             | 63.49          | 27                                  | RDase A      | 2688215644 | 1455        |
| <i>Desulforhopalus singaporensis</i> DSM 12130 | Ga0056957                | 91360         | Black marine mud, Singapore                  | 5.0              | 50.55          | 74                                  | RDase A      | 2596708091 | 1416        |
| <i>Desulfoluna spongiiphila</i>                | Ga0104423                | 2654587882    | Marine sponge                                | 6.54             | 57.2           | 70                                  | RDase A02299 | 2656130309 | 1449        |
|                                                |                          |               |                                              |                  |                |                                     | RDase A07176 | 2656131703 | 1287        |
|                                                |                          |               |                                              |                  |                |                                     | RDase A16032 | 2656133146 | 1680        |
| <i>Desulfomonile tiedjei</i> DCB-1             | Ga0025025                | 706587        | Sludge, Wastewater, USA                      | 6.52             | 50.09          | 71                                  | RDase A1     | 2509738725 | 1680        |
|                                                |                          |               |                                              |                  |                |                                     | RDase A2     | 2509738727 | 1056        |
|                                                |                          |               |                                              |                  |                |                                     | RDase A3     | 2509739354 | 1416        |
| <i>Deferrisoma camini</i> S3R1                 | Ga0026649                | 1125863       | Deep-sea hydrothermal chimney, Pacific Ocean | 4.23             | 70.08          | 29                                  | RDase A      | 2517271284 | 1098        |
| <i>Geobacter lovleyi</i> SZ                    | Ga0028907                | 398767        | Freshwater sediment, South Korea             | 3.99             | 54.74          | 38                                  | RDase A1     | 642678287  | 1545        |
|                                                |                          |               |                                              |                  |                |                                     | RDase A2     | 642678289  | 1545        |
| <i>Desulfobacula phenolica</i> DSM 3384        | Ga0066824                | 90732         | Marine mud, Venice, Italy                    | 4.87             | 41.33          | 55                                  | RDase A1     | 2616662663 | 1404        |
|                                                |                          |               |                                              |                  |                |                                     | RDase A2     | 2616662665 | 1905        |
|                                                |                          |               |                                              |                  |                |                                     | RDase A3     | 2616662682 | 1920        |
|                                                |                          |               |                                              |                  |                |                                     | RDase A4     | 2616662684 | 1404        |
|                                                |                          |               |                                              |                  |                |                                     | RDase A5     | 2616666133 | 1245        |
|                                                |                          |               |                                              |                  |                |                                     | RDase A6     | 2616666538 | 1392        |

**Table S1.** Continued

| Name                                                 | GOLD Analysis Project Id | NCBI Taxon ID | Source                                                    | Genome Size (Mb) | GC Content (%) | $\sigma^{54}$ - Dependent Activator | RDase A gene | Gene ID    | Length (bp) |
|------------------------------------------------------|--------------------------|---------------|-----------------------------------------------------------|------------------|----------------|-------------------------------------|--------------|------------|-------------|
| <i>Desulfobacula toluolica</i><br>Tol2               | Ga0012828                | 651182        | Marine mud,<br>USA                                        | 5.2              | 41.45          | 51                                  | RDase A1     | 2524508258 | 1245        |
|                                                      |                          |               |                                                           |                  |                |                                     | RDase A2     | 2524509456 | 1920        |
|                                                      |                          |               |                                                           |                  |                |                                     | RDase A3     | 2524509458 | 1404        |
| <i>Anaeromyxobacter dehalogenans</i><br>2CP-1        | Ga0027433                | 455488        | Freshwater sediment,<br>Michigan                          | 5.03             | 74.72          | 38                                  | RDase A      | 643593148  | 1923        |
| <i>Anaeromyxobacter dehalogenans</i><br>2CP-C        | Ga0027434                | 290397        | Tropical soil, Cameroon                                   | 5.01             | 74.91          | 40                                  | RDase A      | 637861846  | 1923        |
| <i>Anaeromyxobacter</i> sp. K                        | Ga0027436                | 447217        | Soil                                                      | 5.06             | 74.84          | 43                                  | RDase A      | 642761794  | 1923        |
| <i>Delta-Proteobacterium</i><br>NaphS2               | Ga0031586                | 88274         | Marine sediment,<br>Germany                               | 6.55             | 49.82          | 38                                  | RDase A      | 648669933  | 1437        |
| <i>Desulfosarcina variabilis</i><br>Montpellier      | Ga0010238                | 859321        | Marine mud,<br>Montpellier, France                        | 9.42             | 51.32          | 88                                  | RDase A      | 2502438632 | 1440        |
| <i>Desulfuromusa kysingii</i><br>DSM 7343            | Ga0056096                | 37625         | Marine mud,<br>Germany                                    | 3.74             | 46.63          | 33                                  | RDase A5     | 2599543621 | 1356        |
|                                                      |                          |               |                                                           |                  |                |                                     | RDase A10    | 2599544492 | 1668        |
| <i>Halodesulfobivrio marinisediminis</i><br>DSM 1745 | Ga0008187                | 1121457       | Marine sediment                                           | 3.71             | 44.95          | 35                                  | RDase A      | 2587790293 | 1677        |
| <i>Desulfocarbo indianensis</i><br>SCBM              | Ga0081924                | 1348163       | Coal bed, Indiana, USA                                    | 4.91             | 63.06          | 39                                  | RDase A      | 2654894503 | 1188        |
| <i>Plesiocystis pacifica</i> SIR-1                   | Ga0029812                | 391625        | Marine sandy beach,<br>Japan                              | 10.59            | 70.66          | 27                                  | RDase A      | 641166146  | 1005        |
| <i>Dethiosulfatarculus sandiegensis</i><br>SPR       | Ga0077793                | 1429043       | Methanogenic consortium,<br>paraffin-degrading enrichment | 5.93             | 52.06          | 53                                  | RDase A      | 2629332177 | 1410        |
