# Supplementary material for: Genome-Guided Identification of Organohalide-Respiring Deltaproteobacteria from the Marine Environment
Source: PubMed Central journal article supplement (PMC6299228; doi:10.1128/mbio.02471-18), 2018-12-18
Supplement: mbo006184233st2.pdf [file mbo006184233st2.pdf]

**Table S2.** The genome information of the organohalide-respiring bacteria represented in Figure 1.

| Name                                                    | GOLD Analysis Project Id | NCBI Taxon ID | Source                                                                        | Genome Size (Mb) | GC content (%) | $\sigma^{54}$ - Dependent activator | RDase A |
|---------------------------------------------------------|--------------------------|---------------|-------------------------------------------------------------------------------|------------------|----------------|-------------------------------------|---------|
| <i>Desulfitobacterium chlororespirans</i> DSM 11544     | Ga0008181                | 1121395       | Compost pile, USA                                                             | 5.61             | 47.29          | 40                                  | 2       |
| <i>Desulfitobacterium dehalogenans</i> JW/IU-DC1        | Ga0024867                | 756499        | Freshwater pond sediment, Georgia USA                                         | 4.32             | 44.97          | 21                                  | 6       |
| <i>Desulfitobacterium dichloroeliminans</i> LMG P-21439 | Ga0024953                | 871963        | Soil polluted with 1,2-DCA                                                    | 3.62             | 44.22          | 12                                  | 1       |
| <i>Desulfitobacterium hafniense</i> DCB-2               | Ga0028500                | 272564        | Municipal sludge, Denmark                                                     | 5.28             | 47.54          | 34                                  | 7       |
| <i>Desulfitobacterium hafniense</i> Y51                 | Ga0028501                | 138119        | Soil contaminated with tetrachloroethene, Japan                               | 5.73             | 47.36          | 38                                  | 1       |
| <i>Dehalococcoides mccartyi</i> BAV1                    | Ga0028484                | 216389        | Fresh water, Michigan                                                         | 1.34             | 47.17          | 0                                   | 12      |
| <i>Dehalococcoides mccartyi</i> CBDB1                   | Ga0028485                | 255470        | Anoxic river sediment                                                         | 1.4              | 47.03          | 0                                   | 31      |
| <i>Dehalococcoides mccartyi</i> 195                     | Ga0028483                | 243164        | Anaerobic sewage digester                                                     | 1.47             | 48.85          | 0                                   | 18      |
| <i>Dehalobacter restrictus</i> DSM 9455                 | Ga0025056                | 871738        | PCE-dechlorinating packed-bed column, Netherlands                             | 2.94             | 44.56          | 3                                   | 24      |
| <i>Dehalobacter</i> sp. CF                              | Ga0026847                | 1131462       | 1,1,1-TCA and TCE contaminated site                                           | 3.09             | 44.31          | 1                                   | 17      |
| <i>Nitratireductor pacificus</i> pht-3B                 | Ga0012014                | 391937        | Sediment, Indian Ocean                                                        | 4.47             | 65.51          | 5                                   | 3       |
| <i>Sulfurospirillum multivorans</i> DSM 12446           | Ga0023093                | 1150621       | Activated sludge, Germany                                                     | 3.18             | 40.9           | 4                                   | 2       |
| <i>Dehalogenimonas lykanthroporepellens</i> BL-DC-9     | Ga0028488                | 552811        | Waste recovery well at the Petro-Processors of Louisiana, Inc. Superfund Site | 1.69             | 55.04          | 0                                   | 22      |
| <i>Shewanella sediminis</i> HAW-EB3                     | Ga0030285                | 425104        | Sediment at depth of 215m from an unexploded-ordnance-dumping site at Halifax | 5.52             | 46.08          | 18                                  | 5       |
