# Supplementary material for: Genome-Guided Identification of Organohalide-Respiring Deltaproteobacteria from the Marine Environment
Source: PubMed Central journal article supplement (PMC6299228; doi:10.1128/mbio.02471-18), 2018-12-18
Supplement: mbo006184233st3.pdf [file mbo006184233st3.pdf]

**Table S3.** The 16S rRNA gene database source of OHRBs in Figure 4 and their substrate range.

| Name                                               | Substrate Range                                                                                                                                                                                                       | ID          | Reference                                 |
|----------------------------------------------------|-----------------------------------------------------------------------------------------------------------------------------------------------------------------------------------------------------------------------|-------------|-------------------------------------------|
| <i>Anaeromyxobacter dehalogenans</i> 2CP-1         |                                                                                                                                                                                                                       | 643594130   |                                           |
| <i>Anaeromyxobacter dehalogenans</i> 2CP-C         | 2,6-Dichlorophenol; 2,5-Dichlorophenol;                                                                                                                                                                               | 640712235   | Sanford et al., 2002                      |
| <i>Anaeromyxobacter</i> sp. K                      | 2-Chlorophenol; 2-Bromophenol                                                                                                                                                                                         | 642762693   |                                           |
| <i>Deferrisoma camini</i> S3R1                     | Not Studied                                                                                                                                                                                                           | 2517270461  | -                                         |
| <i>Desulfobacula phenolica</i> DSM 3384            | Not Studied                                                                                                                                                                                                           | 2616666760  | -                                         |
| <i>Desulfobacula toluolica</i> Tol2                | Not Studied                                                                                                                                                                                                           | 2524508170  | -                                         |
| <i>Desulfomonile tiedjei</i> DCB-1                 | 3-Chlorobenzoate; 2,5-Dichlorobenzoate                                                                                                                                                                                | 2509740724  | DeWeerd et al., 1990                      |
| <i>Desulforhopalus singaporensis</i> DSM 12130     | Not Studied                                                                                                                                                                                                           | 2596710058  | -                                         |
| <i>Desulfosarcina variabilis</i> Montpellier       | Not Studied                                                                                                                                                                                                           | 2502441539  | -                                         |
| <i>Desulfovibrio indicus</i> J2                    | Not Studied                                                                                                                                                                                                           | 2688214528  | -                                         |
| <i>Dethiosulfatarculus sandiegensis</i> SPR        | Not Studied                                                                                                                                                                                                           | 2629331604  | -                                         |
| <i>Geobacter lovleyi</i> SZ                        | Tetrachloroethene; Trichloroethene                                                                                                                                                                                    | 642676148   | Sung et al., 2006;<br>Wagner et al., 2012 |
| <i>Plesiocystis pacifica</i> SIR-1                 | Not Studied                                                                                                                                                                                                           | 641164571   | -                                         |
| <i>Deltaproteobacterium</i> sp. NaphS2             | Not Studied                                                                                                                                                                                                           | AJ132804.1  | -                                         |
| <i>Desulfocarbo indianensis</i> SCBM               | Not Studied                                                                                                                                                                                                           | NR_126285.1 | -                                         |
| <i>Desulfoluna spongiiphila</i> AA1                | 2,6-Dibromophenol; 2-Bromophenol; 4-Bromophenol;<br>2,4-Dibromophenol; 2,4,6-Tribromophenol; 2-Iodophenol;<br>3-Iodophenol; 2-Bromo-4-fluorophenol; 3,5-Dibromo-4-hydroxybenzoate;<br>3,5-Dibromo-4-hydroxybenzotrile | NR_115979.1 | Ahn et al., 2009;<br>Liu et al., 2017     |
| <i>Desulfuromonas chloroethenica</i> TT4B          | Tetrachloroethene; Trichloroethene                                                                                                                                                                                    | NR_026012.1 | Krumhlz, 1997                             |
| <i>Desulfomonile limimaris</i> DCB-M               | 3-Chlorobenzoate; 3-Bromobenzoate; 2,3-Dibromobenzoate;<br>2,5-Dibromobenzoate; 3,5-Dichlorobenzoate                                                                                                                  | NR_025079.1 | Sun et al., 2001                          |
| <i>Desulfuromonas michiganensis</i> BB1            | Tetrachloroethene; Trichloroethene                                                                                                                                                                                    | AF357915.2  | Sung et al., 2003                         |
| <i>Desulfuromonas michiganensis</i> BRS1           | Tetrachloroethene; Trichloroethene                                                                                                                                                                                    | AF357914.2  | Sung et al., 2003                         |
| <i>Desulfovibrio bizertensis</i> MB3               | 2,6-Dibromophenol; 2-Bromophenol; 2,4,6-Tribromophenol;<br>2,4-Dibromophenol                                                                                                                                          | NR_043808.1 | This study                                |
| <i>Halodesulfovibrio marinisediminis</i> DSM 17456 | 2,6-Dibromophenol; 2-Bromophenol; 2,4,6-Tribromophenol;<br>2,4-Dibromophenol                                                                                                                                          | NR_041631.1 | This study                                |
| <i>Desulfuromusa kysingii</i> DSM 7343             | 2,6-Dibromophenol; 2-Bromophenol; 2,4,6-Tribromophenol;<br>2,4-Dibromophenol                                                                                                                                          | 2599544949  | This study                                |
| <i>Desulfovibrio</i> sp. TBP-1                     | 2,6-Dibromophenol; 2-Bromophenol; 2,4,6-Tribromophenol;<br>2,4-Dibromophenol; 4-Bromophenol                                                                                                                           | AF090830.1  | Boyle et al., 1999                        |
| <i>Desulfovibrio dechloracetivorans</i> SF3        | 2,6-Dichlorophenol; 2-Chlorophenol                                                                                                                                                                                    | NR_025078.1 | Sun et al., 2000                          |
| <i>Geobacter thiogenes</i> K1 <sup>a</sup>         | Trichloroacetate                                                                                                                                                                                                      | NR_028775.1 | De Wever et al., 2000                     |

a-Reductive dehalogenation of *Geobacter thiogenes* K1 may involve a sulfur-sulfide cycle.

## References:

1. Boyle AW, Phelps CD, Young LY. 1999. Isolation from estuarine sediments of a *Desulfovibrio* strain which can grow on lactate coupled to the reductive dehalogenation of 2,4,6-tribromophenol. *Applied and Environmental Microbiology* **65**:1133-1140.
2. De Wever H, Cole JR, Fettig MR, Hogan DA, Tiedje JM. 2000. Reductive dehalogenation of trichloroacetic acid by *Trichlorobacter thiogenes* gen. nov., sp. nov. *Applied and Environmental Microbiology* **66**:2297-2301.
3. Sanford RA, Cole JR, Tiedje JM. 2002. Characterization and description of *Anaeromyxobacter dehalogenans* gen. nov., sp. nov., an aryl-halo-respiring facultative anaerobic *Myxobacterium*. *Applied and Environmental Microbiology* **68**:893-900.
4. Sun B, Cole JR, Sanford RA, Tiedje JM. 2000. Isolation and characterization of *Desulfovibrio dechloracetivorans* sp. nov., a marine dechlorinating bacterium growing by coupling the oxidation of acetate to the reductive dechlorination of 2-chlorophenol. *Applied and Environmental Microbiology* **66**:2408-2413.
5. Sung Y, Ritalahti KM, Sanford RA, Urbance JW, Flynn SJ, Tiedje JM, Löffler FE. 2003. Characterization of two tetrachloroethene-reducing, acetate-oxidizing anaerobic bacteria and their description as *Desulfuromonas michiganensis* sp. nov. *Applied and Environmental Microbiology* **69**:2964-2974.
6. DeWeerd K, Mandelco L, Tanner R, Woese C, Suflita J. 1990. *Desulfomonile tiedjei* gen. nov. and sp. nov., a novel anaerobic, dehalogenating, sulfate-reducing bacterium. *Archives of Microbiology* **154**:23-30.
7. Wagner DD, Hug LA, Hatt JK, Spitzmiller MR, Padilla-Crespo E, Ritalahti KM, Edwards EA, Konstantinidis KT, Löffler FE. 2012. Genomic determinants of organohalide-respiration in *Geobacter lovleyi*, an unusual member of the *Geobacteraceae*. *BMC Genomics* **13**:200.
8. Liu J, Lopez N, Ahn Y, Goldberg T, Bromberg Y, Kerkhof LJ, Haggblom MM. 2017. Novel reductive dehalogenases from the marine sponge associated bacterium *Desulfoluna spongiiphila*. *Environmental Microbiology Reports* **9**:537-549.
9. Ahn Y-B, Kerkhof LJ, Haggblom MM. 2009. *Desulfoluna spongiiphila* sp. nov., a dehalogenating bacterium in the *Desulfobacteraceae* from the marine sponge *Aplysina aerophoba*. *International Journal of Systematic and Evolutionary Microbiology* **59**:2133-2139.
10. Krumholz LR. 1997. *Desulfuromonas chloroethenica* sp. nov. Uses Tetrachloroethylene and Trichloroethylene as Electron Acceptors. *International Journal of Systematic and Evolutionary Microbiology* **47**:1262-1263.
11. Sun B, Cole JR, Tiedje JM. 2001. *Desulfomonile limimaris* sp. nov., an anaerobic dehalogenating bacterium from marine sediments. *International Journal of Systematic and Evolutionary Microbiology* **51**:365-371.
