# Supplementary material for: Genome-Guided Identification of Organohalide-Respiring Deltaproteobacteria from the Marine Environment
Source: PubMed Central journal article supplement (PMC6299228; doi:10.1128/mbio.02471-18), 2018-12-18
Supplement: mbo006184233st4.pdf [file mbo006184233st4.pdf]

**Table S4.** Putative genes involved in cobalamin biosynthesis in the genomes of organohalide-respiring bacteria tested in this study and *Desulfoluna spongiiphila* strain AA1

| Gene Abbrev.      | Functional Role                                                       | <i>H. marinisediminis</i> | <i>Dur. kysingii</i>     | <i>Dvi. bizertensis</i> | <i>Dlu. spongiiphila</i> |
|-------------------|-----------------------------------------------------------------------|---------------------------|--------------------------|-------------------------|--------------------------|
|                   |                                                                       | Gene ID                   | Gene ID                  | Gene ID                 | Gene ID                  |
| <i>CbiK</i>       | Sirohydrochlorin cobaltochelatase                                     | 2587791438                | 2599543416               | 2568540274              | 2656131771               |
|                   |                                                                       | 2587789883                |                          | 2568540624              | 2656134271               |
| <i>CbiL</i>       | Cobalt-precorrin-2 C20-methyltransferase                              | 2587791434                | 2599543414<br>2599543411 | 2568540270              | 2656134277               |
| <i>CbiH</i>       | Cobalt-precorrin-3b C17-methyltransferase                             | 2587790554                | 2599543408               | 2568541449              | 2656134283               |
| <i>CbiG</i>       | cobalt-precorrin 5a hydrolase                                         | 2587790553                | 2599543409               | 2568541450              | 2656134282               |
| <i>CbiF</i>       | Cobalt-precorrin-4 C11-methyltransferase                              | 2587791567                | 2599543410               | 2568541455              | 2656134281               |
| <i>CbiD</i>       | Cobalt-precorrin-6 synthase                                           | 2587791569                | 2599543413               | 2568540852              | 2656134279               |
| <i>CbiJ</i>       | Cobalt-precorrin-6x reductase                                         | -                         | 2599543407               | -                       | -                        |
| <i>CbiET</i>      | Cobalt-precorrin-6y C5-methyltransferase                              | 2587791568                | 2599543412               | 2568540853              | 2656134280               |
|                   |                                                                       |                           | 2599544127               |                         |                          |
| <i>CbiC</i>       | Cobalt-precorrin-8x methylmutase                                      | 2587790573                | 2599543417               | 2568538875              | 2656134276               |
| <i>CbiA</i>       | Cobyric acid a,c-diamide synthase                                     | 2587790574                | 2599543418               | 2568540851              | 2656134105               |
|                   |                                                                       | 2587790682                |                          | 2568541122              | 2656134275               |
| <i>CobA</i>       | Uroporphyrinogen-III methyltransferase                                | 2587791030                | 2599543419<br>2599542566 | 2568541128              | 2656130579               |
| <i>CbiP</i>       | Cobyric acid synthase                                                 | 2587792387                | 2599542341               | 2568541166              | 2656134285               |
| <i>CobD</i>       | L-threonine 3-O-phosphate decarboxylase                               | 2587792472                | -                        | -                       | 2656134288               |
| <i>CbiB</i>       | Adenosylcobinamide-phosphate synthase                                 | 2587789560                | 2599542342               | 2568541021              | 2656134290               |
| <i>CobU</i>       | Adenosylcobinamide-phosphate guanylyltransferase                      | 2587790455                | 2599542338               | 2568541742              | 2656134286               |
| <i>CobC/CbiY</i>  | Alpha-ribazole-5'-phosphate phosphatase                               | 2587791323                | 2599544128               | 2568539480              | 2656131162               |
| <i>CobT</i>       | Nicotinate-nucleotide-dimethylbenzimidazole phosphoribosyltransferase | 2587790664                | 2599542339               | 2568541109              | 2656129606               |
| <i>CobS</i>       | Cobalamin synthase                                                    | 2587791095                | 2599542340               | 2568540769              | 2656134287               |
|                   |                                                                       | 2587792173                |                          | 2568539740              |                          |
| -                 | Glutamyl-tRNA synthetase                                              | 2587792331                | 2599544587               | 2568538920              | 2656132446               |
|                   |                                                                       | 2587790117                |                          | 2568540059              | 2656133606               |
| <i>HemA</i>       | Glutamyl-tRNA reductase                                               | 2587790085                | 2599542568               | 2568540320              | 2656134349               |
| <i>HemB</i>       | Porphobilinogen synthase                                              | 2587791660                | 2599542565               | 2568539875              | 2656134423               |
| <i>HemC</i>       | Porphobilinogen deaminase                                             | 2587792401                | 2599542567               | 2568541682              | 2656130578               |
| <i>HemE</i>       | Uroporphyrinogen decarboxylase                                        | -                         | 2599542026               | 2568539509              | 2656134671               |
|                   |                                                                       | -                         |                          | 2656131981              |                          |
|                   |                                                                       | -                         |                          | 2656129945              |                          |
|                   |                                                                       | -                         |                          | 2656133015              |                          |
| <i>HemL</i>       | Glutamate-1-semialdehyde aminotransferase                             | 2587790552                | 2599544468               | 2568541451              | 2656131384               |
|                   |                                                                       |                           |                          | -                       | 2656132659               |
|                   |                                                                       |                           |                          | -                       | 2656133626               |
| <i>HemN</i>       | Oxygen-independent coproporphyrinogen-3 oxidase                       | 2587790636                | 2599541825               | 2568539183              | 2656130302               |
|                   |                                                                       |                           | 2599544729               |                         | 2656132734               |
| <i>HemY</i>       | Protoporphyrinogen oxidase                                            | -                         | 2599542035               | -                       | 2656132719               |
|                   |                                                                       | 2587791554                | -                        | 2568539455              | 2656132238               |
| <i>CbiM,N,O,Q</i> | Cobalt/nickel transport system protein                                | 2587792083                | 2599541849               | 2568540623              | 2656132234               |
|                   |                                                                       | 2587792081                |                          | 2568540622              | 2656130427               |
|                   |                                                                       | 2587792082                |                          | 2568541056              | 2656132235               |
|                   |                                                                       | -                         |                          | -                       | 2656132237               |
| <i>BtuBCDF</i>    | Vitamin B12/Fe3+ ABC transporter, permease component                  | 2587791435                | 2599542344               | 2568539097              | 2656131763               |
|                   |                                                                       | -                         | -                        | 2568539554              | 2656134273               |
|                   |                                                                       | -                         | -                        | 2568540272              | 2656131826               |
|                   |                                                                       | -                         | 2599542345               | 2568539555              | 2656131825               |
|                   |                                                                       | -                         | -                        | 2568539098              | 2656131764               |
|                   |                                                                       | 2587791436                | 2599542346               | 2568540273              | 2656134272               |
| <i>BtuR</i>       | Cob(I)alamin adenosyltransferase                                      | -                         | 2599542346               | 2568539556              | 2656131765               |
|                   |                                                                       | -                         | 2599542347               | 2568539099              | 2656131828               |
|                   |                                                                       | 2587791437                | -                        | 2568540271              | 2656134274               |
| <i>CysG</i>       | Siroheme synthase / Precorrin-2 oxidase                               | 2587790087                | -                        | 2568540318              | 2656131122               |
| <i>CysG</i>       | Siroheme synthase / Precorrin-2 oxidase                               | 2587790087                | -                        | 2568540318              | 2656134347               |
