# Supplementary material for: Genome-Guided Identification of Organohalide-Respiring Deltaproteobacteria from the Marine Environment
Source: PubMed Central journal article supplement (PMC6299228; doi:10.1128/mbio.02471-18), 2018-12-18
Supplement: mbo006184233st5.pdf [file mbo006184233st5.pdf]

**Table S5.** Nucleotide primer sequences used for RT-PCR in this study.

| Strain                                                | Primer                    | Sequence (5'-3')           | Target Gene     | Product Length (bp) |
|-------------------------------------------------------|---------------------------|----------------------------|-----------------|---------------------|
| <i>Halodesulfovibrio marinisediminis</i><br>DSM 17456 | 653F                      | GAGGGAAGTGGAATTTCTGGTGTAG  | 16S rRNA        | 94                  |
|                                                       | 747R                      | CAGTGTCTAGTAATAGTCCAGGAAGT |                 |                     |
|                                                       | 725F                      | AGCCTATGGAGTTCAAATCACCTAA  | RDase A gene    | 99                  |
|                                                       | 824R                      | GGGTCAAATTTAGCAATACCAACCA  |                 |                     |
| <i>Desulfuromusa kysingii</i><br>DSM 7343             | 887F                      | CGCAAGGCTAAAACCTCAAAGGAA   | 16S rRNA        | 88                  |
|                                                       | 975R                      | GGTAAGGTTCTTCGCGTTGC       |                 |                     |
|                                                       | 650F                      | TCGTTGATAATGGGCGCGATA      | RDase A5 gene   | 98                  |
|                                                       | 748R                      | CGACATTTGTTTTTCAGCCCGT     |                 |                     |
|                                                       | 621F                      | TTCCACCATTCCAGAAGATCCAG    | RDase A10 gene  | 70                  |
|                                                       | 691R                      | CCCATTTTTCTGGAGGTTGTTCC    |                 |                     |
| <i>Desulfovibrio bizertensis</i><br>DSM 18034         | 209F                      | CATGCTTTCACCTCTAGATGAGTCC  | 16S rRNA        | 91                  |
|                                                       | 300R                      | CCTCTTAGACCAGTTATCCATCGTC  |                 |                     |
|                                                       | 993F                      | GATTCTGACCAACATGCCGC       | RDase A2-1 gene | 90                  |
|                                                       | 1083R                     | CTCGCGGGCACACTTTTTTAC      |                 |                     |
|                                                       | 367F                      | CTGTATGGCATGGAACGGATGAA    | RDase A2-2 gene | 84                  |
|                                                       | 451R                      | CATCATTCAGCTCAAAGGTCCC     |                 |                     |
|                                                       | 213F                      | CTACCAGCGTTTTTCTACAGCAAAT  | RDase A3 gene   | 96                  |
|                                                       | 309R                      | CTTGATTAATTTCTGCCATACGGT   |                 |                     |
| 1012F                                                 | CAATTCCTGAAAGAAGTGGGCTATC | RDase A18 gene             | 66              |                     |
| 1078R                                                 | TCATGATTTTCGTAGTTGTGACCG  |                            |                 |                     |
